# Supplementary material
Source: ML conference proceedings conference paper supplement (https://proceedings.neurips.cc/paper_files/paper/2022/hash/d9696563856bd350e4e7ac5e5812f23c-Abstract.html)
Supplement: Supplementary file 1 [file d9696563856bd350e4e7ac5e5812f23c-Supplemental-Datasets_and_Benchmarks.zip]

Archive with 2 entries (2 files):
- appendix.pdf
- datasheet.pdf
